# Supplementary material
Source: ML conference proceedings conference paper supplement (https://proceedings.neurips.cc/paper_files/paper/2023/hash/11822e84689e631615199db3b75cd0e4-Abstract.html)
Supplement: Supplementary file 1 [file 11822e84689e631615199db3b75cd0e4-Supplemental-Conference.zip]

Archive with 5 entries (5 files):
- croma_appendix.pdf
- croma_models.py
- croma_transformer.py
- croma_utils.py
- croma_readme.md
